# Supplementary material for: Emoticon-Based Ambivalent Expression: A Hidden Indicator for Unusual Behaviors in Weibo
Source: PLOS journal article supplement (doi:10.1371/journal.pone.0147079), 2016-01-22
Supplement: S1 (10.1371/journal.pone.0147079.s001) [file journal.pone.0147079.s001]

# PLOS ONE Supporting Information

---

## Supporting Information Captions

S1 Datasets. The datasets download location. All the datasets collected from Weibo can be freely downloaded from the permanent location in figshare.com:

<https://dx.doi.org/10.6084/m9.figshare.2060046>.
